# Supplementary material for: Integrated Long-Term Care ‘Neighbourhoods’ to Support Older Populations: Evolving Strategies in Japan and England
Source: MDPI journal article supplement (doi:10.3390/ijerph20146352), 2023-07-12
Supplement: s1 [file s1]

**Table S1.** Development of Health and Welfare Policies for Older Adults in England

| Date: Development                                               | Major policies                                                                                                                                                                                                                                                                                                                  |                                                                                                                                                                                                           |
|-----------------------------------------------------------------|---------------------------------------------------------------------------------------------------------------------------------------------------------------------------------------------------------------------------------------------------------------------------------------------------------------------------------|-----------------------------------------------------------------------------------------------------------------------------------------------------------------------------------------------------------|
|                                                                 | Welfare/ Social Care                                                                                                                                                                                                                                                                                                            | Healthcare                                                                                                                                                                                                |
| <b>1900s:</b> Early 20 <sup>th</sup> Century Liberalism         | 1908 <i>Old Age Pensions Act</i><br>1929 <i>Local Government Act</i><br>◇ Poor Law power transfer to local authorities (LAs)s                                                                                                                                                                                                   | 1911 <i>National Health Insurance Act</i><br>1929 Poor Law Hospitals become LA responsibility                                                                                                             |
| <b>1940s:</b> Beginning of ‘Welfare State’                      | 1942 Beveridge: <i>Social Insurance &amp; Allied Services</i> .<br>◇ Introduction of National Insurance                                                                                                                                                                                                                         | 1944 White Paper, <i>A National Health Service</i>                                                                                                                                                        |
| <b>1946-48:</b> ‘Welfare State’ established (post World War II) | 1948 <i>National Assistance Act</i> (Abolished Poor Law)<br>◇ Older people needing care & attention admitted to residential homes under LAs                                                                                                                                                                                     | <i>National Health Service (NHS) Bill</i><br>◇ Hospitals incorporated into NHS.<br>◇ Older people who are sick admitted to hospital                                                                       |
| <b>1970s:</b> NHS reorganization                                | 1970 <i>Local Authority and Social Services Act</i><br>◇ Established personal social services departments in local authorities (LAs)                                                                                                                                                                                            | 1973 <i>NHS Reorganisation Act</i><br>◇ Area health authorities (HAs) now responsible for services divided between hospital boards before                                                                 |
| <b>1980s:</b> Supporting people ‘in the community’              | 1981 White Paper, <i>Growing Older</i><br>◇ Public services role ‘to help people to care for themselves and their families’<br>1989 White Paper <i>Caring for People: Community care in the next decade and beyond</i> .                                                                                                        | 1980 <i>Health Services Act</i><br>◇ Area HAs replaced by District HAs, many no longer coterminous with LAs<br>1987 White Paper, <i>Promoting Better Health</i><br>◇ Improved patient choice              |
| <b>1990s:</b> Funding of social care                            | 1996 <i>Community Care (Direct Payments) Act</i><br>◇ Direct payment to arrange own support for some<br>1998 White Paper, <i>Modernising Social Services: Promoting independence, improving protection, raising standards</i><br>1999 Royal Commission on Long Term Care<br>◇ Ongoing funding of long-term care of older people | 1990 <i>NHS and Community Care Act</i><br>◇ NHS reorganization & Creation of internal market<br>1997 White Paper, <i>The new NHS: Modern, dependable</i><br>1998 Acheson Inquiry - Inequalities in health |

**Table S1 (contd).** Development of Health and Welfare Policies for Older Adults in England

| Date: Development                                         | Major policies                                                                                                                                                                                                                     |                                                                                                                                                                                                                                                           |
|-----------------------------------------------------------|------------------------------------------------------------------------------------------------------------------------------------------------------------------------------------------------------------------------------------|-----------------------------------------------------------------------------------------------------------------------------------------------------------------------------------------------------------------------------------------------------------|
|                                                           | Welfare/ Social Care                                                                                                                                                                                                               | Healthcare                                                                                                                                                                                                                                                |
| <b>2000s:</b> Health & social care ‘partnership’          | 2000 <i>Care Standards Act</i><br>◇ Registration & regulation of care services, and social care workers<br>2001 <i>The National Service Framework for Older People</i><br>◇ Standards to improve quality of support.               | 2000 <i>The NHS Plan</i><br>◇ Development of intermediate care as bridge between hospital and home.<br>2006 White Paper, <i>Our Health, Our Care, Our Say</i><br>◇ Reforms for people with long-term needs.                                               |
| <b>2010s:</b> Beginning of ‘integration’ of health & care | 2010 White Paper, <i>Building the National Care Service</i><br>2011 Degree-level nurse education & specialist geriatric nurse training<br>2011 <i>Dilnot Review</i><br>◇ Recommends major reforms to funding of adult social care  | 2010 <i>Health and Social Care Bill</i><br>◇ Increased GP role commissioning health services<br>2019 <i>NHS Long Term Plan</i><br>◇ Aims to improve patient care over next ten years                                                                      |
| <b>2020s:</b>                                             | 2021 Post-pandemic recovery plan, <i>Build Back Better: Our Plan for Health and Social Care</i><br>2021 White Paper <i>People at the Heart of Care: Adult Social Care Reform</i><br>◇ Ten-year vision for adult social care reform | 2021 White Paper, <i>Working together to improve health and social care for all</i><br>2022 White Paper, <i>Joining up care for people, places and populations</i><br>2022 <i>Health and Care Act</i><br>◇ Legislation to integrate services for patients |

*Sources:*

Wanless, D. (2006). Securing good care for older people: taking a long-term view. Retrieved from [https://www.kingsfund.org.uk/sites/default/files/field/field\\_publication\\_file/securing-good-care-for-older-people-wanless-2006.pdf](https://www.kingsfund.org.uk/sites/default/files/field/field_publication_file/securing-good-care-for-older-people-wanless-2006.pdf)

Nuffield Trust. (2023). NHS reform timeline (1940s to 2020s). Retrieved from <https://www.nuffieldtrust.org.uk/features/nhs-reform-timeline>
